# Supplementary material for: The Three-Level Curriculum Sports Psychiatry and an Evaluation of the First Course “Basic Health Care in Sports Psychiatry”
Source: Atypon-hosted journal article supplement (doi:10.1024/1661-8157/a003845), 2022-03-01
Supplement: 1661-8157_a003845_esm1.pdf [file 1661-8157_a003845_esm1.pdf]

## Evaluation of the first course

### «Basic Health Care in Sports Psychiatry»

The first course of the Curriculum Level 1 „Basic Health Care in Sports Psychiatry“ took place in October 2021. Out of the ten participants, nine had a background in psychiatry or psychology. One participant had a background in sports medicine, in addition she had a qualification in psychotherapy. 50% of the participants had first-hand experience as competitive athletes themselves. 50% of the participants also had current treatment of mental disorders with movement and sports. 50% of the participants had previous working experience in this area. 20% of the participants stated that they were treating competitive athletes. 30% of the participants stated to have previous working experience in this area. All of the participants stated that they aim to treat and prevent mental disorders with exercise and sports. 70% of the participants stated that they aim to treat competitive athletes facing mental illness with exercise and sports. This would also include the prevention of mental illness with exercise and sports. All participants stated that the contents of the course were presented comprehensibly. The team consisted of three psychiatrists, two of these being instructors, and two sports physicians.

Using the Likert-6 scale from 1 to 6 within the Mann-Whitney U test to compare the expectations regarding the learning goals with the fulfilment of the expectations, the evaluation resulted in non-significant differences in all areas ( $n = 10$ ), as shown in Table 5. The area of expectations regarding the learning goals included „profoundly important“, „very important“, „rather important“, „rather unimportant“, „very unimportant“ and „absolutely unimportant“. The area of fulfilment of expectations included „absolutely fulfilled“, „very fulfilled“, „rather fulfilled“, „rather unfulfilled“, „hardly fulfilled“ and „not fulfilled at all“. When it comes to relevant knowledge derived from working experience, the low scores can be regarded as indicative for the participants' desire for more focus on the combination of theory and everyday practice.

Likewise, this may also be regarded as indicative when it comes down to passing on knowledge in aspects regarding prevention and aftercare of mental illness as well as basic knowledge in sports medicine and sports psychology.

Between 70 and 100% of the participants regarded the defined learning goals as important (table 5). Between 80 and 100% of the participants regarded the expectations in this course as fulfilled (table 6). 9 out of 10 regarded the expectations regarding the

content of the course as fulfilled (table 7). 90% of the participants stated that the theoretical background was broadened by this course. 80% of the participants stated that the contents of this course can help within the day-to-day professional practice.

The interpretation of the results presented may be limited due to the small number of participants of the course. Nevertheless it gives a first positive impression of the contents offered in the Curriculum Level 1. Judging from the mainly positive feedback, this can be interpreted as a bonus for such a specialised knowledge transfer in sport psychiatry.

**Table 5.** Comparison of the expectations before and the assessment after the course

| Expectations before the course/Assessment after the course      | Rank-sum Values |       | U-value | Significance for $\alpha = 0.05$ |
|-----------------------------------------------------------------|-----------------|-------|---------|----------------------------------|
|                                                                 | before          | after |         |                                  |
| Knowledge transfer of ...                                       |                 |       |         |                                  |
| ... ethical basis                                               | 66              | 96    | 59      | n.s.                             |
| ... legal basis                                                 | 67              | 94    | 61      | n.s.                             |
| ... basic knowledge in sports science & applied training theory | 81              | 84    | 71      | n.s.                             |
| ... basic knowledge in sports medicine & sports psychology      | 77              | 60    | 78      | n.s.                             |
| ... interdisciplinary aspects                                   | 72              | 93    | 62      | n.s.                             |
| ... interprofessional aspects                                   | 73              | 81    | 74      | n.s.                             |
| ... organizational and institutional aspects                    | 56              | 92    | 63      | n.s.                             |
| ... aspects of the life span                                    | 73              | 74    | 81      | n.s.                             |
| ... gender aspects                                              | 65              | 100   | 55      | n.s.                             |
| ... practical knowledge                                         | 62              | 53    | 93      | n.s.                             |
| ... evidence-based medicine                                     | 73              | 73    | 82      | n.s.                             |
| ... knowledge about diagnosis of mental disorders               | 64              | 91    | 64      | n.s.                             |
| ... differential diagnosis aspects                              | 67              | 78    | 77      | n.s.                             |
| ... knowledge about therapy of mental disorders                 | 82              | 82    | 73      | n.s.                             |
| ... knowledge about aftercare of mental disorders               | 89              | 83    | 66      | n.s.                             |
| ... knowledge about characteristics of competitive sports       | 64              | 65    | 90      | n.s.                             |
| ... aspects of leisure sports                                   | 66              | 96    | 59      | n.s.                             |
| ... aspects of parasports                                       | 64              | 105   | 50      | n.s.                             |
| ... aspects of prevention                                       | 82              | 73    | 73      | n.s.                             |
| ... practical experience                                        | 80              | 53    | 75      | n.s.                             |

Notes: n = 10; n.s. = not significant

**Table 6.** Expectations before the course, grouped (important vs. unimportant)

| Expectations before the course                                       | important | un-<br>important | empty<br>field | Percentage<br>share<br>important<br>(%) |
|----------------------------------------------------------------------|-----------|------------------|----------------|-----------------------------------------|
| For me ... is                                                        |           |                  |                |                                         |
| ... ethical basis                                                    | 9         | 0                | 1              | 90                                      |
| ... legal basis                                                      | 9         | 1                | 0              | 90                                      |
| ... basic knowledge in sports science and<br>applied training theory | 9         | 1                | 0              | 90                                      |
| ... basic knowledge in sports medicine<br>and sports psychology      | 10        | 0                | 0              | 100                                     |
| ... interdisciplinary aspects                                        | 8         | 1                | 1              | 80                                      |
| ... interprofessional aspects                                        | 9         | 0                | 1              | 90                                      |
| ... organizational and institutional<br>aspects                      | 7         | 3                | 0              | 70                                      |
| ... aspects of the life span                                         | 9         | 1                | 0              | 90                                      |
| ... gender aspects                                                   | 8         | 2                | 0              | 80                                      |
| ... practical knowledge                                              | 9         | 0                | 1              | 90                                      |
| ... evidence-based medicine                                          | 10        | 0                | 0              | 100                                     |
| ... knowledge about diagnosis of mental<br>disorders                 | 9         | 1                | 0              | 90                                      |
| ... differential diagnosis aspects                                   | 9         | 0                | 1              | 90                                      |
| ... knowledge about therapy of mental<br>disorders                   | 7         | 2                | 1              | 70                                      |
| ... knowledge about aftercare of mental<br>disorders                 | 8         | 2                | 0              | 80                                      |
| ... knowledge about characteristics of<br>competitive sports         | 10        | 0                | 0              | 100                                     |
| ... aspects of leisure sports                                        | 10        | 0                | 0              | 100                                     |
| ... aspects of parasports                                            | 8         | 2                | 0              | 80                                      |
| ... aspects of prevention                                            | 9         | 0                | 1              | 90                                      |
| ... practical experience                                             | 10        | 0                | 0              | 100                                     |

Note: n = 10

**Table 7.** Assessment after the course, grouped (important vs. unimportant)

| <b>Assessment after the course</b>                              |            |                |                    |                                 |
|-----------------------------------------------------------------|------------|----------------|--------------------|---------------------------------|
| My expectations on the knowledge transfer of ... have been:     | <b>met</b> | <b>not met</b> | <b>empty field</b> | <b>percentage share met (%)</b> |
| ... ethical basis                                               | 9          | 1              | 0                  | 90                              |
| ... legal basis                                                 | 9          | 1              | 0                  | 90                              |
| ... basic knowledge in sports science & applied training theory | 8          | 1              | 1                  | 80                              |
| ... basic knowledge in sports medicine & sports psychology      | 9          | 1              | 0                  | 90                              |
| ... interdisciplinary aspects                                   | 9          | 1              | 0                  | 90                              |
| ... interprofessional aspects                                   | 8          | 2              | 0                  | 80                              |
| ... organizational and institutional aspects                    | 9          | 0              | 1                  | 90                              |
| ... aspects of the life span                                    | 8          | 1              | 1                  | 80                              |
| ... gender aspects                                              | 8          | 1              | 1                  | 80                              |
| ... practical knowledge                                         | 8          | 0              | 2                  | 80                              |
| ... evidence-based medicine                                     | 8          | 2              | 0                  | 80                              |
| ... knowledge about diagnosis of mental disorders               | 10         | 0              | 0                  | 100                             |
| ... differential diagnosis aspects                              | 10         | 0              | 0                  | 100                             |
| ... knowledge about therapy of mental disorders                 | 10         | 0              | 0                  | 100                             |
| ... knowledge about aftercare of mental disorders               | 8          | 1              | 1                  | 80                              |
| ... knowledge about characteristics of competitive sports       | 10         | 0              | 0                  | 100                             |
| ... aspects of leisure sports                                   | 9          | 0              | 1                  | 90                              |
| ... aspects of parasports                                       | 9          | 0              | 1                  | 90                              |
| ... aspects of prevention                                       | 10         | 0              | 0                  | 100                             |
| ... practical experience                                        | 10         | 0              | 0                  | 100                             |

Note: n = 10

**Table 8.** Global assessment after the course

| One-week course «Basic Health Care in Sports Psychiatry» | Correct | rather correct | does rather not apply | does not apply | percentage share important (%) |
|----------------------------------------------------------|---------|----------------|-----------------------|----------------|--------------------------------|
| My expectations on the course contents have been met     | 6       | 3              | 1                     | 0              | 90                             |
| The course contents were well explained                  | 7       | 3              | 0                     | 0              | 100                            |
| The course contents have extended my knowledge           | 7       | 2              | 1                     | 0              | 90                             |
| The course contents are helpful in occupational practice | 6       | 2              | 2                     | 0              | 80                             |

Note: n = 10
